# Supplementary material for: Finerenone, Serum Potassium, and Clinical Outcomes in Heart Failure With Mildly Reduced or Preserved Ejection Fraction
Source: PubMed Central journal article supplement — JAMA Cardiol. 2024 Nov 17:e244539. Online ahead of print. doi: 10.1001/jamacardio.2024.4539 (PMC11571067; doi:10.1001/jamacardio.2024.4539), 2024-11-17

## Supplemental Online Content

Vardeny O, Vaduganathan M, Claggett BL, et al. Finerenone, Serum Potassium, and Clinical Outcomes in Heart Failure With Mildly Reduced or Preserved Ejection Fraction. *JAMA Cardiol*. Published online November 17, 2024. doi:10.1001/jamacardio.2024.4539

**eFigure 1.** Patient Flow

**eTable 1.** Patients experiencing postrandomization potassium levels above 5.5 mmol/l

**eTable 2.** Patients Experiencing postrandomization Potassium Levels below 3.5 mmol/l

**eFigure 2.** Rates of cardiovascular death or total worsening heart failure across a range of time-updated potassium levels postrandomization by treatment

This supplemental material has been provided by the authors to give readers additional information about their work.

eFigure 1. Patient Flow

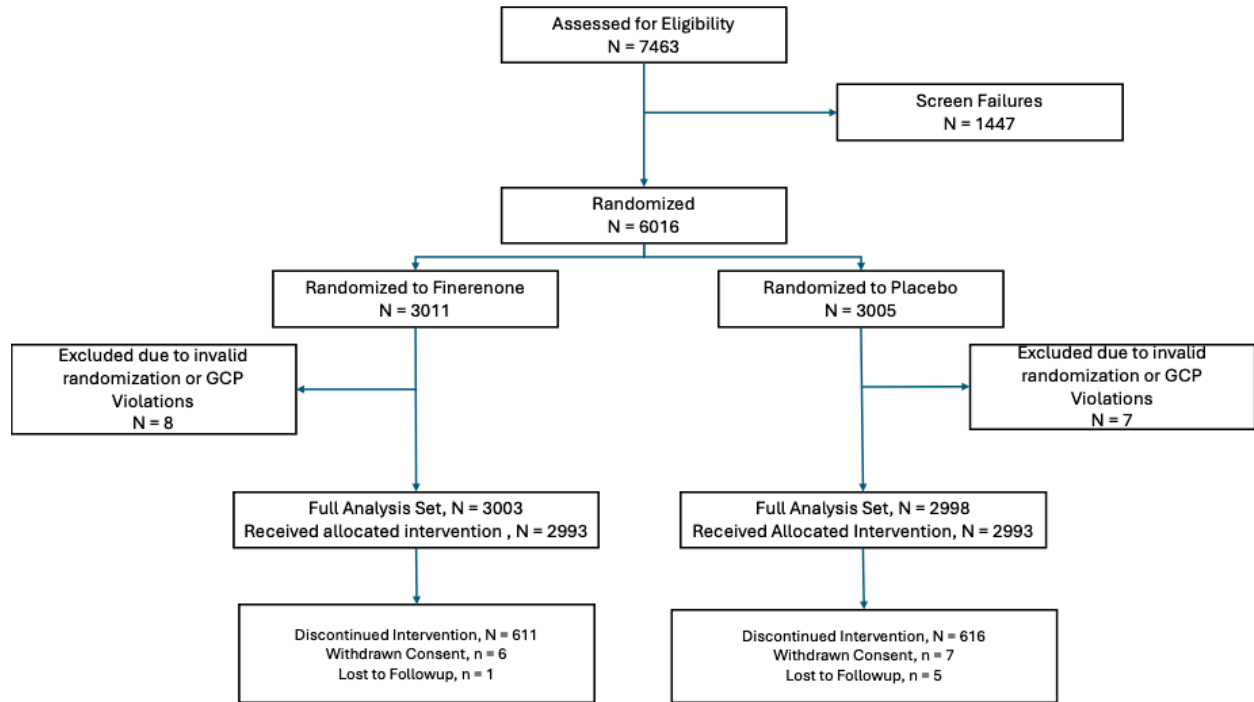

eTable 1. Patients experiencing post-randomization potassium levels above 5.5 mmol/l

|                                                  | No potassium >5.5 mmol/L<br>n=5203 | Any potassium >5.5 mmol/L<br>n=633 |         |
|--------------------------------------------------|------------------------------------|------------------------------------|---------|
| Age                                              | 72.0 ± 9.7                         | 71.6 ± 9.2                         | p=0.37  |
| Women                                            | 2382 (45.8%)                       | 255 (40.3%)                        | p=0.009 |
| <u>Race</u>                                      |                                    |                                    | p<0.001 |
| Asian                                            | 908 (17.5%)                        | 65 (10.3%)                         |         |
| Black                                            | 78 (1.5%)                          | 8 (1.3%)                           |         |
| Other                                            | 155 (3.0%)                         | 23 (3.6%)                          |         |
| White                                            | 4062 (78.1%)                       | 537 (84.8%)                        |         |
| <u>Region</u>                                    |                                    |                                    | p=0.33  |
| Asia                                             | 895 (17.2%)                        | 65 (10.3%)                         |         |
| Eastern Europe                                   | 2233 (42.9%)                       | 356 (56.2%)                        |         |
| Latin America                                    | 556 (10.7%)                        | 69 (10.9%)                         |         |
| North America                                    | 410 (7.9%)                         | 46 (7.3%)                          |         |
| Western Europe, Oceania<br>and Others            | 1109 (21.3%)                       | 97 (15.3%)                         |         |
| Any prior HF<br>Hospitalization                  | 3094 (59.5%)                       | 404 (63.8%)                        | p=0.035 |
| <u>Recency of Heart Failure<br/>Event</u>        |                                    |                                    | p=0.59  |
| <= 7 days from<br>randomization                  | 1021 (19.6%)                       | 145 (22.9%)                        |         |
| >7 days - <= 3 months                            | 1776 (34.1%)                       | 191 (30.2%)                        |         |
| >3 months or no index HF<br>event                | 2406 (46.2%)                       | 297 (46.9%)                        |         |
| Baseline Systolic Blood<br>Pressure (mmHg)       | 129.3 ± 15.4                       | 130.4 ± 14.4                       | p=0.10  |
| Baseline Body Mass Index<br>(kg/m <sup>2</sup> ) | 30.0 ± 6.1                         | 29.6 ± 5.7                         | p=0.18  |
| Baseline Creatinine<br>(mg/dL)                   | 1.1 ± 0.3                          | 1.2 ± 0.5                          | p<0.001 |
| Baseline eGFR<br>(mL/min/1.73m <sup>2</sup> )    | 62.8 ± 19.7                        | 57.6 ± 19.4                        | p<0.001 |
| Baseline eGFR < 60<br>mL/min/1.73m <sup>2</sup>  | 2428 (46.7%)                       | 368 (58.1%)                        | p<0.001 |
| Baseline UACR (mg/g)                             | 18 [ 7 , 63 ]                      | 22 [ 8 , 102 ]                     | p<0.001 |
| Baseline potassium<br>(mmol/L)                   | 4.3 ± 0.5                          | 4.7 ± 0.5                          | p<0.001 |
| Baseline LVEF (%)                                | 52.6 ± 7.8                         | 52.1 ± 7.7                         | p=0.10  |
| Baseline NT-proBNP<br>(pg/mL)                    | 1014 [441 , 1901 ]                 | 1163 [501 , 2344 ]                 | p<0.001 |
| <u>NYHA class</u>                                |                                    |                                    | p=0.19  |
| NYHA class II                                    | 3623 (69.6%)                       | 424 (67.0%)                        |         |
| NYHA class III                                   | 1543 (29.7%)                       | 207 (32.7%)                        |         |
| NYHA class IV                                    | 36 (0.7%)                          | 2 (0.3%)                           |         |
| History of Hypertension<br>(N)                   | 4603 (88.5%)                       | 574 (90.7%)                        | p=0.10  |
| Diabetes Mellitus at<br>baseline                 | 2059 (39.6%)                       | 320 (50.6%)                        | p<0.001 |

|                                                  |              |             |         |
|--------------------------------------------------|--------------|-------------|---------|
| Atrial fibrill. at baseline<br>electrocardiogram | 1995 (38.3%) | 231 (36.5%) | p=0.37  |
| History of Stroke                                | 617 (11.9%)  | 68 (10.7%)  | p=0.41  |
| Any prior HF<br>Hospitalization                  | 3094 (59.5%) | 404 (63.8%) | p=0.035 |
| History of myocardial<br>infarction              | 1318 (25.3%) | 195 (30.8%) | p=0.003 |
| Beta blocker                                     | 4415 (84.9%) | 553 (87.4%) | p=0.09  |
| ACEI                                             | 1856 (35.7%) | 249 (39.3%) | p=0.07  |
| ARB                                              | 1813 (34.8%) | 237 (37.4%) | p=0.20  |
| ARNI                                             | 448 (8.6%)   | 46 (7.3%)   | p=0.25  |
| Calcium channel blockers                         | 1704 (32.8%) | 216 (34.1%) | p=0.49  |
| SGLT-2 inhibitor                                 | 717 (13.8%)  | 79 (12.5%)  | p=0.37  |
| Loop diuretic                                    | 4532 (87.1%) | 562 (88.8%) | p=0.23  |
| Digoxin                                          | 405 (7.8%)   | 56 (8.8%)   | p=0.35  |
| Potassium supplement                             | 645 (12.4%)  | 49 (7.7%)   | p<0.001 |
| Randomized to finerenone<br>(vs. placebo)        | 2495 (48.0%) | 426 (67.3%) | p<0.001 |

eTable 2. Patients Experiencing post-randomization Potassium Levels below 3.5 mmol/l

|                                               | No potassium <3.5 mmol/L (after treatment start)<br>n=5392 | Any potassium <3.5 mmol/L (after treatment start)<br>n=444 |         |
|-----------------------------------------------|------------------------------------------------------------|------------------------------------------------------------|---------|
| Age                                           | 71.9 ± 9.6                                                 | 72.3 ± 10.5                                                | p=0.37  |
| Women                                         | 2410 (44.7%)                                               | 227 (51.1%)                                                | p=0.009 |
| <u>Race</u>                                   |                                                            |                                                            | p<0.001 |
| Asian                                         | 845 (15.7%)                                                | 128 (28.8%)                                                |         |
| Black                                         | 77 (1.4 %)                                                 | 9 (2.0 %)                                                  |         |
| Other                                         | 169 (3.1 %)                                                | 9 (2.0 %)                                                  |         |
| White                                         | 4301 (79.8%)                                               | 298 (67.1%)                                                |         |
| <u>Region</u>                                 |                                                            |                                                            | p=0.15  |
| Asia                                          | 836 (15.5%)                                                | 124 (27.9%)                                                |         |
| Eastern Europe                                | 2457 (45.6%)                                               | 132 (29.7%)                                                |         |
| Latin America                                 | 582 (10.8%)                                                | 43 (9.7 %)                                                 |         |
| North America                                 | 417 (7.7 %)                                                | 39 (8.8 %)                                                 |         |
| Western Europe, Oceania and Others            | 1100 (20.4%)                                               | 106 (23.9%)                                                |         |
| Any prior HF Hospitalization                  | 3212 (59.6%)                                               | 286 (64.4%)                                                | p=0.045 |
| <u>Recency of Heart Failure Event</u>         |                                                            |                                                            | p=0.12  |
| <= 7 days from randomization                  | 1075 (19.9%)                                               | 91 (20.5%)                                                 |         |
| >7 days - <= 3 months                         | 1800 (33.4%)                                               | 167 (37.6%)                                                |         |
| >3 months or no index HF event                | 2517 (46.7%)                                               | 186 (41.9%)                                                |         |
| Baseline Systolic Blood Pressure (mmHg)       | 129.4 ± 15.2                                               | 129.1 ± 16.3                                               | p=0.61  |
| Baseline Body Mass Index (kg/m <sup>2</sup> ) | 30.0 ± 6.1                                                 | 29.5 ± 6.4                                                 | p=0.09  |
| Baseline Creatinine (mg/dL)                   | 1.1 ± 0.4                                                  | 1.1 ± 0.4                                                  | p=0.83  |
| Baseline eGFR (mL/min/1.73m <sup>2</sup> )    | 62.3 ± 19.6                                                | 61.1 ± 20.6                                                | p=0.23  |
| Baseline eGFR < 60 mL/min/1.73m <sup>2</sup>  | 2574 (47.7%)                                               | 222 (50.0%)                                                | p=0.36  |
| Baseline UACR (mg/g)                          | 18 [ 7 , 65 ]                                              | 21 [ 9 , 74 ]                                              | p=0.012 |
| Baseline potassium (mmol/L)                   | 4.4 ± 0.5                                                  | 4.0 ± 0.5                                                  | p<0.001 |
| Baseline LVEF (%)                             | 52.5 ± 7.8                                                 | 53.4 ± 7.8                                                 | p=0.013 |
| Baseline NT-PRO BNP (pg/mL)                   | 1014 [438 , 1916 ]                                         | 1312 [616 , 2264 ]                                         | p<0.001 |
| <u>NYHA class</u>                             |                                                            |                                                            | p=0.17  |
| NYHA CLASS II                                 | 3750 (69.6%)                                               | 297 (66.9%)                                                |         |
| NYHA CLASS III                                | 1612 (29.9%)                                               | 138 (31.1%)                                                |         |
| NYHA CLASS IV                                 | 29 (0.5 %)                                                 | 9 (2.0 %)                                                  |         |
| History of Hypertension (N)                   | 4777 (88.6%)                                               | 400 (90.1%)                                                | p=0.34  |
| Diabetes Mellitus at baseline                 | 2218 (41.1%)                                               | 161 (36.3%)                                                | p=0.045 |
| Atrial fibrill. at BL electrocardiogram       | 2016 (37.4%)                                               | 210 (47.3%)                                                | p<0.001 |

|                                         |              |             |         |
|-----------------------------------------|--------------|-------------|---------|
| History of Stroke: Med Hist<br>Checkbox | 620 (11.5%)  | 65 (14.6%)  | p=0.048 |
| Any prior HF Hospitalization            | 3212 (59.6%) | 286 (64.4%) | p=0.045 |
| History of myocardial<br>infarction (N) | 1420 (26.3%) | 93 (20.9%)  | p=0.013 |
| Beta blocker use at baseline            | 4607 (85.4%) | 361 (81.3%) | p=0.019 |
| ACEI use                                | 1982 (36.8%) | 123 (27.7%) | p<0.001 |
| ARB use (w/o ARNI)                      | 1905 (35.3%) | 145 (32.7%) | p=0.26  |
| ARNI use at baseline                    | 447 (8.3 %)  | 47 (10.6%)  | p=0.09  |
| Calcium channel blockers<br>use at bl.  | 1761 (32.7%) | 159 (35.8%) | p=0.17  |
| SGLT-2 inhib. use at<br>baseline        | 743 (13.8%)  | 53 (11.9%)  | p=0.28  |
| Loop diuretic at baseline               | 4699 (87.1%) | 395 (89.0%) | p=0.27  |
| Digoxin use at baseline                 | 428 (7.9 %)  | 33 (7.4 %)  | p=0.70  |
| Potassium supplement                    | 623 (11.6%)  | 71 (16.0%)  | p=0.005 |
| Randomized treatment                    | 2776 (51.5%) | 145 (32.7%) | p<0.001 |

eFigure 2. Rates of cardiovascular death or total worsening heart failure across a range of time-updated potassium levels post-randomization by treatment

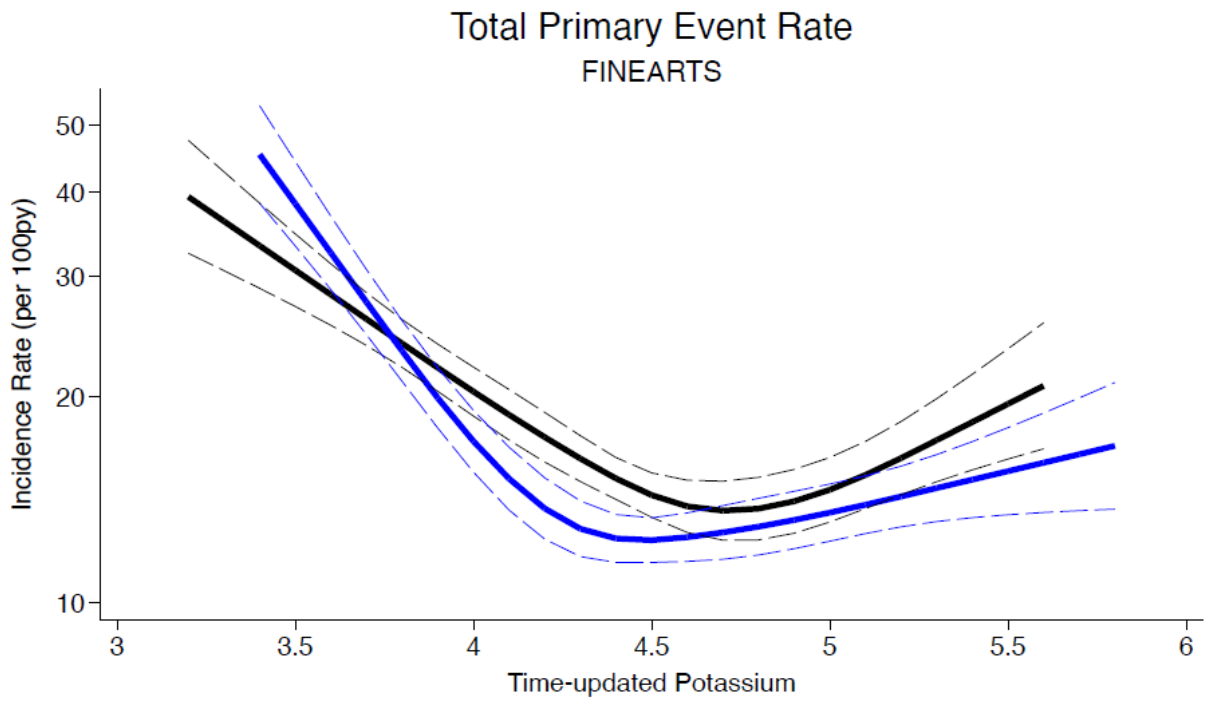

Supplement: jamacardiol-e244539-s002.pdf [file jamacardiol-e244539-s002.pdf]
