# Supplementary material for: Finerenone, Serum Potassium, and Clinical Outcomes in Heart Failure With Mildly Reduced or Preserved Ejection Fraction
Source: PubMed Central journal article supplement — JAMA Cardiol. 2024 Nov 17:e244539. Online ahead of print. doi: 10.1001/jamacardio.2024.4539 (PMC11571067; doi:10.1001/jamacardio.2024.4539), 2024-11-17
Supplement: jamacardiol-e244539-s003.pdf [file jamacardiol-e244539-s003.pdf]

## Data Sharing Statement

Vardeny. Finerenone, Serum Potassium, and Clinical Outcomes in Heart Failure With Mildly Reduced or Preserved Ejection Fraction. *JAMA Cardiol.* Published November 17, 2024.  
doi:10.1001/jamacardio.2024.4539

### Data

**Additional Information:** NCT04435626

**Data available:** No

### Additional Information

**Explanation for why data not available:** Data will be made available to qualified scientific and medical researchers through vivli.org. All requests will be reviewed by an independent scientific review panel and data provided according to the conditions laid out on <https://vivli.org/ourmember/bayer/>
